# Supplementary material for: Impact of KMT2A Rearrangement and CSPG4 Expression in Pediatric Acute Myeloid Leukemia
Source: MDPI journal article supplement (doi:10.3390/cancers13194817), 2021-09-26
Supplement: s1 [file s1]

*Article*

# Impact of KMT2A Rearrangement and CSPG4 Expression in Pediatric Acute Myeloid Leukemia

Lina Marie Hoffmeister <sup>1,\*</sup>, Eser Orhan <sup>2</sup>, Christiane Walter <sup>1</sup>, Naghmeh Niktoreh <sup>1</sup>, Helmut Hanenberg <sup>1,3</sup>, Nils von Neuhoff <sup>1</sup>, Dirk Reinhardt <sup>1</sup> and Markus Schneider <sup>1,\*</sup>

## Supplementary Material

### 1. Data Sharing Statements BFM

The AML-BFM Study Group Data Sharing policy describes the release and use of AML-BFM individual subject data for use in research projects in accordance with EU-Directive of Good Clinical Practice, the guidelines of the German Research Foundation (DFG) and the German Society of Pediatric Oncology and Hematology (GPOH). Only data expressly released from the oversight of the relevant AML-BFM Data and Safety Monitoring Committee (DSMC) are available to be shared. Data sharing will ordinarily be considered only after the primary study manuscript is accepted for publication. For phase III trials, individual-level de-identified datasets that would be sufficient to reproduce results provided in a publication containing the primary study analysis can be requested from the AML-BFM data management. Data are available to researchers who wish to analyze the data in secondary studies to enhance the public health benefit of the original work and agree to the terms and conditions of use. For non-phase III trials, data are available following the primary publication. An individual-level de-identified dataset containing the variables analyzed in the primary results paper can be expected to be available upon request. Requests for access to AML-BFM protocol research data should be sent to the AML-BFM Study Group offices. Data are available to researchers whose proposed analysis is found by the AML-BFM research board to be feasible and of scientific merit and who agree to the terms and conditions of use. For all requests, no other study documents, including the protocol, will be made available and no end date exists for requests. In addition to above, release of data collected in a clinical trial conducted under a binding collaborative agreement between AML-BFM Study Group and a pharmaceutical/biotechnology company must comply with the data sharing terms of the binding collaborative/contractual agreement and must receive the proper approvals.

## 2. Supplementary Figures S1–S3

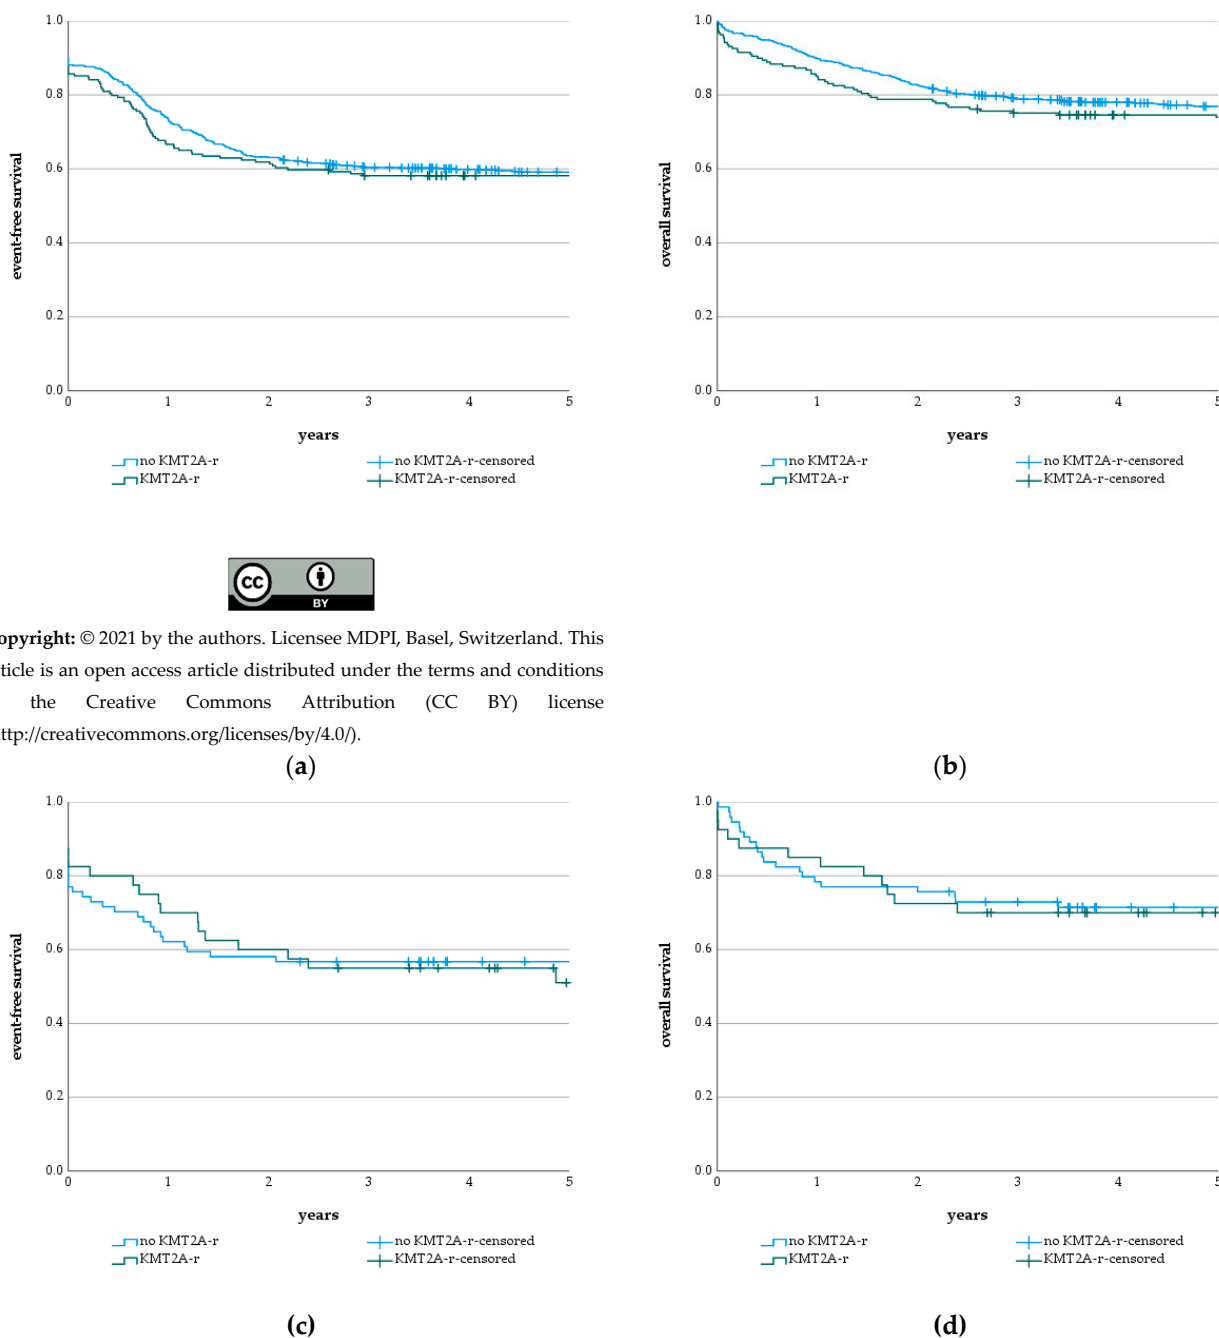

**Figure S1.** Survival of pediatric AML patients depending on *KMT2A* rearrangements (*KMT2A-r*) and risk group. (a) 5-year event-free survival (EFS) of pediatric AML patients with *KMT2A-r* ( $58.2\% \pm 3.6\%$ ;  $n = 189$ ) and without *KMT2A-r* ( $59.2\% \pm 2.0\%$ ;  $n = 607$ ) stratified into standard or intermediate risk group ( $p = 0.523$ ); (b) 5-year overall survival (OS) of pediatric AML patients with *KMT2A-r* ( $74.0\% \pm 3.2\%$ ;  $n = 189$ ) and without *KMT2A-r* ( $76.9\% \pm 1.7\%$ ;  $n = 607$ ) stratified into standard or intermediate risk group ( $p = 0.361$ ); (c) 5-year event-free survival (EFS) of pediatric AML patients with *KMT2A-r* ( $51.1\% \pm 8.2\%$ ;  $n = 40$ ) and without *KMT2A-r* ( $56.8\% \pm 5.8\%$ ;  $n = 74$ ) stratified into high risk group ( $p = 0.864$ ); (d) 5-year overall survival (OS) of pediatric AML patients with *KMT2A-r* ( $70.0\% \pm 7.2\%$ ;  $n = 40$ ) and without *KMT2A-r* ( $71.5\% \pm 5.3\%$ ;  $n = 74$ ) stratified into high risk group ( $p = 0.856$ ). Significance was calculated with log-rank test.

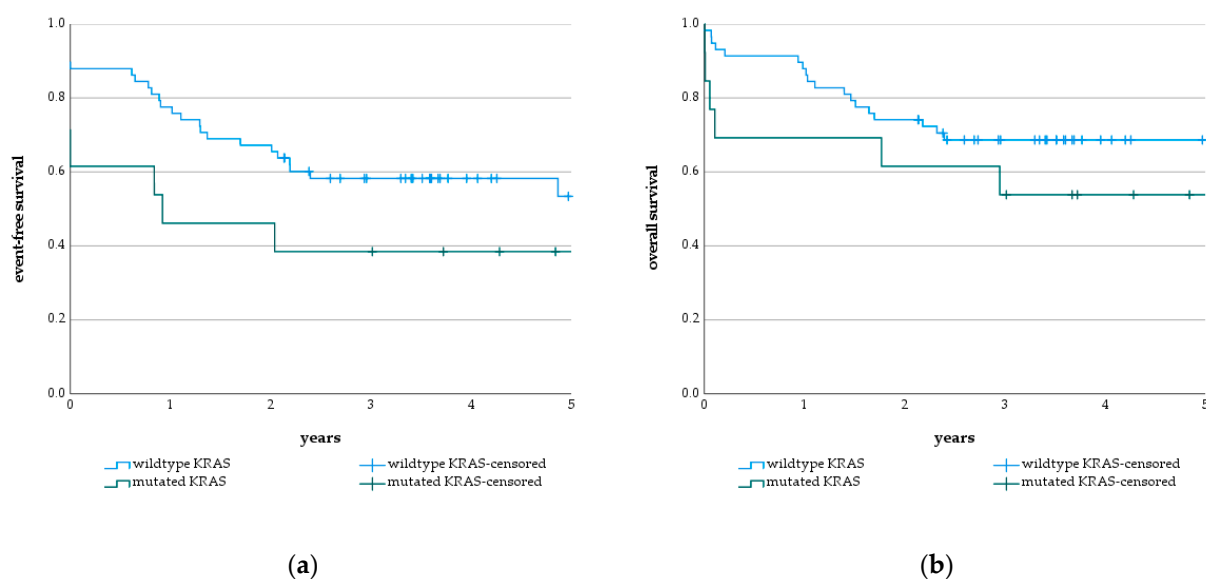

**Figure S2.** Survival of pediatric AML patients with *KMT2A-r* and with or without *KRAS* mutation. (a) 5-year event-free survival (EFS) of pediatric AML patients with *KMT2A-r* and with wildtype ( $53.4\% \pm 7.6\%$ ;  $n = 58$ ) or mutated *KRAS* ( $38.5\% \pm 13.5\%$ ;  $n = 13$ ) ( $p = 0.113$ ). (b) 5-year overall survival (OS) of pediatric AML patients with *KMT2A-r* and with wildtype ( $68.7\% \pm 6.1\%$ ;  $n = 58$ ) or mutated *KRAS* ( $53.8\% \pm 13.8\%$ ;  $n = 13$ ) ( $p = 0.103$ ). Significance was calculated with log-rank test.

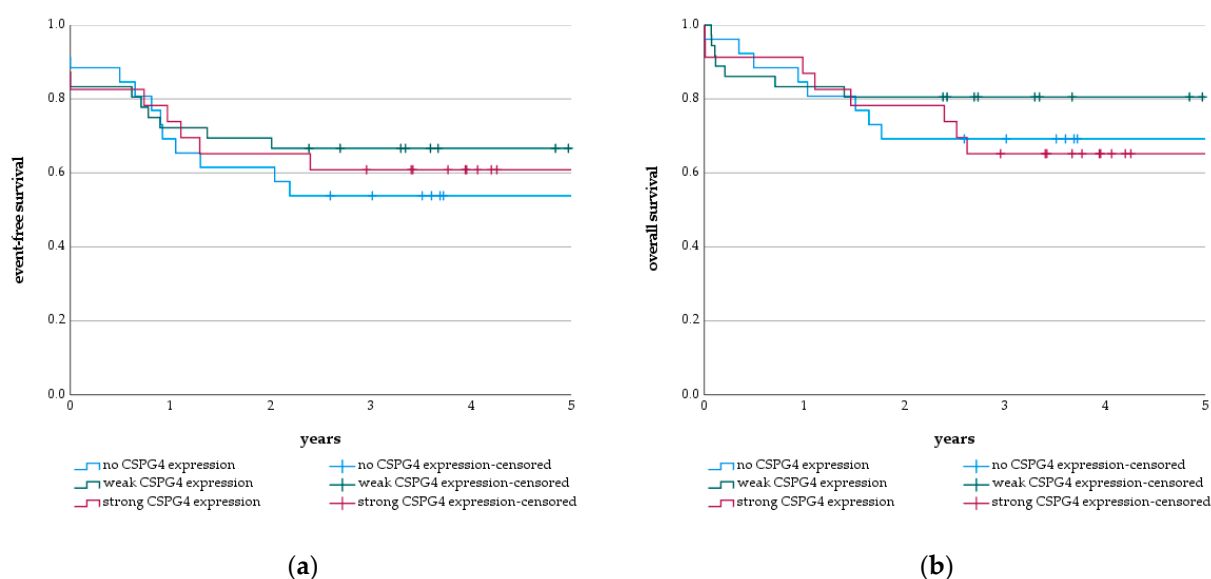

**Figure S3.** Survival of pediatric AML patients with *KMT2A-r* depending on CSPG4 expression level. (a) 5-year event-free survival (EFS) of pediatric AML patients with *KMT2A-r* and without CSPG4 expression ( $53.8\% \pm 9.8\%$ ;  $n = 26$ ), with weak ( $66.7\% \pm 7.9\%$ ;  $n = 36$ ) or strong CSPG4 expression ( $60.9\% \pm 10.2\%$ ;  $n = 23$ ) ( $p = 0.526$ ). (b) 5-year overall survival (OS) of pediatric AML patients with *KMT2A-r* and without CSPG4 expression ( $69.2\% \pm 9.1\%$ ;  $n = 26$ ), with weak ( $80.6\% \pm 6.6\%$ ;  $n = 36$ ) or strong CSPG4 expression ( $65.2\% \pm 9.9\%$ ;  $n = 23$ ) ( $p = 0.398$ ). Significance was calculated with log-rank test.

## 3. Supplementary Tables S1–S5

**Table S1.** Clinical characteristics of pediatric AML patients with and without mutational screening via next-generation sequencing using the Illumina TruSight Myeloid Panel (TSM).

| Features                                    |                   | All Patients |      | TSM   |     | No TSM |     | p-Value                      |
|---------------------------------------------|-------------------|--------------|------|-------|-----|--------|-----|------------------------------|
| Number                                      |                   | 967          | 100% | 309   | 32% | 658    | 68% |                              |
| Age at diagnosis                            | Median            | 8.3          |      | 9.9   |     | 7.9    |     | 0.008 <sup>T</sup><br>(**)   |
|                                             | MIN               | 0.0          |      | 0.0   |     | 0.0    |     |                              |
|                                             | MAX               | 18.0         |      | 17.9  |     | 18.0   |     |                              |
| Gender                                      | Male              | 491          | 100% | 168   | 34% | 323    | 66% | 0.126 <sup>C</sup><br>(n.s.) |
|                                             | Female            | 476          | 100% | 141   | 30% | 335    | 70% |                              |
| WBC count<br>[×10 <sup>3</sup> /μl]         | Median            | 16.1         |      | 22.7  |     | 13.5   |     | 0.010 <sup>T</sup><br>(*)    |
|                                             | MIN               | 0.0          |      | 0.6   |     | 0.0    |     |                              |
|                                             | MAX               | 817.1        |      | 817.1 |     | 585.0  |     |                              |
| Hemoglobin<br>[g/dl]                        | Median            | 8.3          |      | 8.3   |     | 8.3    |     | 0.706 <sup>T</sup><br>(n.s.) |
|                                             | MIN               | 2.1          |      | 2.1   |     | 2.6    |     |                              |
|                                             | MAX               | 18.3         |      | 17.1  |     | 18.3   |     |                              |
| Platelet count<br>[×10 <sup>3</sup> /μl]    | Median            | 66.0         |      | 64.5  |     | 67.0   |     | 0.900 <sup>T</sup><br>(n.s.) |
|                                             | MIN               | 2.0          |      | 6.0   |     | 2.0    |     |                              |
|                                             | MAX               | 1,370        |      | 722   |     | 1,370  |     |                              |
| Risk groups                                 | Standard risk     | 244          | 27%  | 54    | 21% | 190    | 29% | <0.001 <sup>C</sup><br>(***) |
|                                             | Intermediate risk | 552          | 61%  | 133   | 52% | 419    | 64% |                              |
|                                             | High risk         | 114          | 13%  | 70    | 27% | 44     | 7%  |                              |
|                                             | No data           | 57           | -    | 52    | -   | 5      | -   |                              |
| Morphologic subtype<br>(FAB classification) | M0                | 19           | 2%   | 5     | 2%  | 14     | 2%  | 0.052 <sup>C</sup><br>(n.s.) |
|                                             | M1                | 112          | 14%  | 39    | 19% | 73     | 12% |                              |
|                                             | M2                | 175          | 22%  | 46    | 23% | 129    | 21% |                              |
|                                             | M4                | 134          | 17%  | 36    | 18% | 98     | 16% |                              |
|                                             | M4 eo             | 67           | 8%   | 16    | 8%  | 51     | 8%  |                              |
|                                             | M5                | 198          | 25%  | 48    | 24% | 150    | 25% |                              |
|                                             | M6                | 12           | 1%   | 2     | 1%  | 10     | 2%  |                              |
|                                             | M7                | 88           | 11%  | 11    | 5%  | 77     | 13% |                              |
|                                             | No data           | 162          | -    | 106   | -   | 56     | -   |                              |
| CSPG4 expression                            | Strong positive   | 31           | 9%   | 24    | 10% | 7      | 6%  | 0.403 <sup>C</sup><br>(n.s.) |
|                                             | Weak positive     | 55           | 16%  | 37    | 16% | 18     | 16% |                              |
|                                             | Negative          | 260          | 75%  | 170   | 74% | 90     | 78% |                              |
|                                             | No data           | 621          | -    | 78    | -   | 543    | -   |                              |

<sup>T</sup> unpaired *t*-test; <sup>C</sup> Pearson's chi square test; \* *p* < 0.05; \*\* *p* < 0.01; \*\*\* *p* < 0.001; n.s. not significant

**Table S2.** Clinical characteristics of pediatric AML patients with and without analysis for CSPG4 expression via multicolor flow cytometry.

| Features                                    |                   | All Patients |      | CSPG4 Cohort |     | Cohort Not Analyzed for CSPG4 |     | p-Value                      |
|---------------------------------------------|-------------------|--------------|------|--------------|-----|-------------------------------|-----|------------------------------|
| Number                                      |                   | 967          | 100% | 346          | 36% | 621                           | 64% |                              |
| Age at diagnosis                            | Median            | 8.3          |      | 9.1          |     | 7.9                           |     | 0.101 <sup>†</sup><br>(n.s.) |
|                                             | MIN               | 0.0          |      | 0.0          |     | 0.0                           |     |                              |
|                                             | MAX               | 18.0         |      | 18.0         |     | 18.0                          |     |                              |
| Gender                                      | Male              | 491          | 100% | 174          | 35% | 317                           | 65% | 0.821 <sup>‡</sup><br>(n.s.) |
|                                             | Female            | 476          | 100% | 172          | 36% | 304                           | 64% |                              |
| WBC count<br>[x10 <sup>3</sup> /μl]         | Median            | 16.1         |      | 19.5         |     | 14.2                          |     | 0.687 <sup>†</sup><br>(n.s.) |
|                                             | MIN               | 0.0          |      | 0.2          |     | 0.0                           |     |                              |
|                                             | MAX               | 817.1        |      | 817.1        |     | 585.0                         |     |                              |
| Hemoglobin<br>[g/dl]                        | Median            | 8.3          |      | 8.4          |     | 8.3                           |     | 0.969 <sup>†</sup><br>(n.s.) |
|                                             | MIN               | 2.1          |      | 2.1          |     | 2.6                           |     |                              |
|                                             | MAX               | 18.3         |      | 17.1         |     | 18.3                          |     |                              |
| Platelet count [x10 <sup>3</sup> /μl]       | Median            | 66.0         |      | 66.0         |     | 66.0                          |     | 0.753 <sup>†</sup><br>(n.s.) |
|                                             | MIN               | 2.0          |      | 6.0          |     | 2.0                           |     |                              |
|                                             | MAX               | 1370.0       |      | 863.0        |     | 1370                          |     |                              |
| Risk groups                                 | Standard risk     | 244          | 27%  | 68           | 22% | 176                           | 29% | <0.001 <sup>‡</sup><br>(***) |
|                                             | Intermediate risk | 552          | 61%  | 160          | 51% | 392                           | 66% |                              |
|                                             | High risk         | 114          | 13%  | 85           | 27% | 29                            | 5%  |                              |
|                                             | No data           | 57           | -    | 33           | -   | 24                            | -   |                              |
| Morphologic subtype<br>(FAB classification) | M0                | 19           | 2%   | 7            | 3%  | 12                            | 2%  | 0.576 <sup>‡</sup><br>(n.s.) |
|                                             | M1                | 112          | 14%  | 34           | 14% | 78                            | 14% |                              |
|                                             | M2                | 175          | 22%  | 56           | 22% | 119                           | 21% |                              |
|                                             | M4                | 134          | 17%  | 48           | 19% | 86                            | 16% |                              |
|                                             | M4 eo             | 67           | 8%   | 21           | 8%  | 46                            | 8%  |                              |
|                                             | M5                | 198          | 25%  | 61           | 24% | 137                           | 25% |                              |
|                                             | M6                | 12           | 1%   | 1            | 0%  | 11                            | 2%  |                              |
|                                             | M7                | 88           | 11%  | 23           | 9%  | 65                            | 12% |                              |
|                                             | No data           | 162          | -    | 95           | -   | 67                            | -   |                              |

<sup>†</sup> unpaired *t*-test; <sup>‡</sup> Pearson's chi square test; \* *p* < 0.05; \*\* *p* < 0.01; \*\*\* *p* < 0.001; n.s. not significant

**Table S3.** KRAS mutations and correlation with specific KMT2A-r.

|                               | mutated KRAS | wildtype KRAS |
|-------------------------------|--------------|---------------|
| no KMT2A-r                    | 13           | 225           |
| all AML with KMT2A-r          | 13           | 58            |
| KMT2A/MLLT3                   | 5            | 24            |
| KMT2A/MLLT10                  | 3            | 14            |
| KMT2A/AFDN                    | 1            | 2             |
| KMT2A/MLLT1                   | 0            | 6             |
| KMT2A/MLLT11                  | 0            | 2             |
| KMT2A/AFF1                    | 0            | 2             |
| KMT2A/SEPTIN9                 | 2            | 0             |
| KMT2A/ELL                     | 1            | 1             |
| KMT2A/MLLT6                   | 0            | 1             |
| KMT2A/PRPF19                  | 0            | 2             |
| KMT2A/ABI2                    | 0            | 1             |
| KMT2A/KNL1                    | 0            | 1             |
| KMT2A/USP2                    | 0            | 1             |
| KMT2A-r not further specified | 1            | 1             |

**Table S4.** Genetic aberrations and dependency on *KMT2A-r* status.

| Aberrations           | no <i>KMT2A-r</i> ( <i>n</i> = 238) |       | <i>KMT2A-r</i> ( <i>n</i> = 71) |       |
|-----------------------|-------------------------------------|-------|---------------------------------|-------|
|                       | Total*                              | %     | Total*                          | %     |
| <i>FLT3</i> -ITD      | 64                                  | 26.9% | 2                               | 2.8%  |
| <i>WT1</i>            | 50                                  | 21.0% | 0                               | 0.0%  |
| <i>NRAS</i>           | 49                                  | 20.6% | 17                              | 23.9% |
| <i>NUP98/NSD1</i>     | 12 (of 65)                          | 18.5% | 0 (of 32)                       | 0.0%  |
| trisomy 8             | 32                                  | 13.4% | 10                              | 14.1% |
| <i>NPM1</i>           | 28                                  | 11.8% | 0                               | 0.0%  |
| <i>RUNX1/RUNX1T1</i>  | 27                                  | 11.3% | 0                               | 0.0%  |
| <i>CBFB/MYH11</i>     | 23                                  | 9.7%  | 0                               | 0.0%  |
| <i>CEBPA</i>          | 23                                  | 9.7%  | 0                               | 0.0%  |
| <i>KIT</i>            | 14                                  | 5.9%  | 0                               | 0.0%  |
| <i>KRAS</i>           | 13                                  | 5.5%  | 13                              | 18.3% |
| <i>MLLT10/PICALM</i>  | 3 (of 56)                           | 5.4%  | 0 (of 32)                       | 0.0%  |
| <i>PICALM/MLLT10</i>  | 3 (of 56)                           | 5.4%  | 0 (of 32)                       | 0.0%  |
| monosomy 7            | 12                                  | 5.0%  | 1                               | 1.4%  |
| <i>FLT3</i> -TKD      | 11                                  | 4.6%  | 6                               | 8.5%  |
| <i>PTPN11</i>         | 10                                  | 4.2%  | 1                               | 1.4%  |
| <i>ASXL1</i>          | 9                                   | 3.8%  | 2                               | 2.8%  |
| <i>GATA2</i>          | 9                                   | 3.8%  | 0                               | 0.0%  |
| <i>MIR3667HG/BRD1</i> | 2 (of 56)                           | 3.6%  | 0 (of 32)                       | 0.0%  |
| <i>KAT6A/CREBBP</i>   | 2 (of 56)                           | 3.6%  | 0 (of 32)                       | 0.0%  |
| <i>PRDM16/SKI</i>     | 2 (of 56)                           | 3.6%  | 0 (of 32)                       | 0.0%  |
| <i>RUNX1/CBFA2T3</i>  | 2 (of 229)                          | 3.6%  | 0 (of 69)                       | 0.0%  |
| <i>RUNX1</i>          | 7                                   | 2.9%  | 0                               | 0.0%  |
| <i>TET2</i>           | 6                                   | 2.5%  | 0                               | 0.0%  |
| <i>DNMT3A</i>         | 5                                   | 2.1%  | 0                               | 0.0%  |
| <i>IDH2</i>           | 5                                   | 2.1%  | 0                               | 0.0%  |
| <i>CBFB/NFATC3</i>    | 1 (of 56)                           | 1.8%  | 0 (of 32)                       | 0.0%  |
| <i>CPD/LRRC37B</i>    | 1 (of 56)                           | 1.8%  | 0 (of 32)                       | 0.0%  |
| <i>ETV6/MN1</i>       | 1 (of 56)                           | 1.8%  | 0 (of 32)                       | 0.0%  |
| <i>ETV6/NCOA2</i>     | 1 (of 56)                           | 1.8%  | 0 (of 32)                       | 0.0%  |
| <i>ETV6/NDUFA5</i>    | 1 (of 56)                           | 1.8%  | 0 (of 32)                       | 0.0%  |
| <i>G3BP1/PDGFRB</i>   | 1 (of 56)                           | 1.8%  | 0 (of 32)                       | 0.0%  |
| <i>KDM5A/NUP98</i>    | 1 (of 56)                           | 1.8%  | 0 (of 32)                       | 0.0%  |
| <i>MN1/ETV6</i>       | 1 (of 56)                           | 1.8%  | 0 (of 32)                       | 0.0%  |
| <i>MTCH2/WT1</i>      | 1 (of 56)                           | 1.8%  | 0 (of 32)                       | 0.0%  |
| <i>NCOA2/ETV6</i>     | 1 (of 56)                           | 1.8%  | 0 (of 32)                       | 0.0%  |
| <i>NPM1/MLF1</i>      | 1 (of 56)                           | 1.8%  | 0 (of 32)                       | 0.0%  |
| <i>NUP214/ABL1</i>    | 1 (of 56)                           | 1.8%  | 0 (of 32)                       | 0.0%  |
| <i>NUP98/KDM5A</i>    | 1 (of 56)                           | 1.8%  | 0 (of 32)                       | 0.0%  |
| <i>PIM3/BRD1</i>      | 1 (of 56)                           | 1.8%  | 0 (of 32)                       | 0.0%  |
| <i>PSPC1/ZMYM2</i>    | 1 (of 56)                           | 1.8%  | 0 (of 32)                       | 0.0%  |
| <i>SLC17A5/PICALM</i> | 1 (of 56)                           | 1.8%  | 0 (of 32)                       | 0.0%  |
| <i>SPI1/ZNF384</i>    | 1 (of 56)                           | 1.8%  | 0 (of 32)                       | 0.0%  |
| <i>UGCG/PVT1</i>      | 1 (of 56)                           | 1.8%  | 0 (of 32)                       | 0.0%  |
| <i>ZNF384/SPI1</i>    | 1 (of 56)                           | 1.8%  | 0 (of 32)                       | 0.0%  |
| <i>DEK/NUP214</i>     | 4 (of 229)                          | 1.7%  | 0 (of 69)                       | 0.0%  |
| <i>BCORL</i>          | 4                                   | 1.7%  | 1                               | 1.4%  |
| <i>ETV6/TEL</i>       | 4                                   | 1.7%  | 1                               | 1.4%  |
| <i>EZH2</i>           | 3                                   | 1.3%  | 3                               | 4.2%  |
| <i>JAK2</i>           | 3                                   | 1.3%  | 0                               | 0.0%  |
| <i>KDM6A</i>          | 3                                   | 1.3%  | 0                               | 0.0%  |
| <i>PHF6</i>           | 3                                   | 1.3%  | 0                               | 0.0%  |
| <i>RAD21</i>          | 3                                   | 1.3%  | 2                               | 2.8%  |

|                            |            |      |           |      |
|----------------------------|------------|------|-----------|------|
| <i>TP53</i>                | 3          | 1.3% | 1         | 1.4% |
| <i>BCOR</i>                | 2          | 0.8% | 1         | 1.4% |
| <i>IDH1</i>                | 2          | 0.8% | 0         | 0.0% |
| <i>KMT2A</i>               | 2          | 0.8% | 0         | 0.0% |
| <i>NOTCH1</i>              | 2          | 0.8% | 0         | 0.0% |
| trisomy 12                 | 2          | 0.8% | 0         | 0.0% |
| <i>CBFA2T3/GLIS2</i>       | 1 (of 230) | 0.4% | 0 (of 69) | 0.0% |
| <i>BCR/ABL</i>             | 1          | 0.4% | 0         | 0.0% |
| <i>CBL</i>                 | 1          | 0.4% | 0         | 0.0% |
| <i>CDKN2A</i>              | 1          | 0.4% | 1         | 1.4% |
| <i>CSF3R</i>               | 1          | 0.4% | 0         | 0.0% |
| <i>IKZF1</i>               | 1          | 0.4% | 0         | 0.0% |
| <i>MPL 1</i>               | 1          | 0.4% | 0         | 0.0% |
| <i>PTEN</i>                | 1          | 0.4% | 0         | 0.0% |
| <i>SMC1A</i>               | 1          | 0.4% | 0         | 0.0% |
| <i>STAG2</i>               | 1          | 0.4% | 0         | 0.0% |
| <i>U2AF1</i>               | 1          | 0.4% | 1         | 1.4% |
| <i>ZRSR2</i>               | 1          | 0.4% | 0         | 0.0% |
| <i>ABL1</i>                | 0          | 0.0% | 0         | 0.0% |
| <i>ARHGAP21/KMT2A</i>      | 0 (of 56)  | 0.0% | 1 (of 32) | 3.1% |
| <i>ATRX</i>                | 0          | 0.0% | 0         | 0.0% |
| <i>BRAF</i>                | 0          | 0.0% | 0         | 0.0% |
| <i>CALR</i>                | 0          | 0.0% | 0         | 0.0% |
| <i>CBLB</i>                | 0          | 0.0% | 0         | 0.0% |
| <i>CBLC</i>                | 0          | 0.0% | 0         | 0.0% |
| <i>CUX1</i>                | 0          | 0.0% | 0         | 0.0% |
| <i>ELL/KMT2A</i>           | 0 (of 56)  | 0.0% | 1 (of 32) | 3.1% |
| <i>FBXW7</i>               | 0          | 0.0% | 0         | 0.0% |
| <i>GATA1</i>               | 0          | 0.0% | 0         | 0.0% |
| <i>GNAS</i>                | 0          | 0.0% | 0         | 0.0% |
| <i>HRAS</i>                | 0          | 0.0% | 0         | 0.0% |
| <i>JAK3</i>                | 0          | 0.0% | 0         | 0.0% |
| <i>MLLT10/CCNYL1</i>       | 0 (of 56)  | 0.0% | 1 (of 32) | 3.1% |
| <i>MLLT10/DNAJC1</i>       | 0 (of 56)  | 0.0% | 1 (of 32) | 3.1% |
| <i>MLLT10/GUCY1A2</i>      | 0 (of 56)  | 0.0% | 1 (of 32) | 3.1% |
| <i>MLLT10/LOC100131626</i> | 0 (of 56)  | 0.0% | 1 (of 32) | 3.1% |
| <i>MLLT10/PIP4K2A</i>      | 0 (of 56)  | 0.0% | 1 (of 32) | 3.1% |
| <i>MLLT10/SDHAF2</i>       | 0 (of 56)  | 0.0% | 1 (of 32) | 3.1% |
| <i>MLLT10/SFMBT2</i>       | 0 (of 56)  | 0.0% | 1 (of 32) | 3.1% |
| <i>MLLT10/ZMYM2</i>        | 0 (of 56)  | 0.0% | 1 (of 32) | 3.1% |
| <i>MLLT1/KMT2A</i>         | 0 (of 56)  | 0.0% | 2 (of 32) | 6.3% |
| <i>MLLT3/KMT2A</i>         | 0 (of 56)  | 0.0% | 1 (of 32) | 3.1% |
| <i>MLLT6/KMT2A</i>         | 0 (of 56)  | 0.0% | 1 (of 32) | 3.1% |
| <i>MYD88</i>               | 0          | 0.0% | 0         | 0.0% |
| <i>PDGFRA</i>              | 0          | 0.0% | 0         | 0.0% |
| <i>PIP4K2A/KMT2A</i>       | 0 (of 56)  | 0.0% | 1 (of 32) | 3.1% |
| <i>PIWIL4/ZMYM2</i>        | 0 (of 56)  | 0.0% | 1 (of 32) | 3.1% |
| <i>SETBP1</i>              | 0          | 0.0% | 0         | 0.0% |
| <i>SF3B1</i>               | 0          | 0.0% | 0         | 0.0% |
| <i>SMC3</i>                | 0          | 0.0% | 0         | 0.0% |
| <i>SRSF2</i>               | 0          | 0.0% | 0         | 0.0% |
| <i>ZMYM2/TAS2R13</i>       | 0 (of 56)  | 0.0% | 1 (of 32) | 3.1% |

\*If the number of analyzed patients differentiates from the total cohort, the number of analyzed patients is stated in parentheses.

**Table S5.** Samples of patients with weak or strong CSPG4 expression and associated gene fusions and mutations.

|                               | ID           | KAT6A/NCOA2 | NUP98/KDM5A | KAT6A/EP300 | KAT6A/CREBBP | CBFB/MYH11 | KDM6A    | WT1      |
|-------------------------------|--------------|-------------|-------------|-------------|--------------|------------|----------|----------|
| weak<br>CSPG4<br>expression   | AMLR12DEKR4  | -           | -           | -           | -            | -          | -        | -        |
|                               | AMLR12DEEF6  | -           | -           | -           | -            | -          | -        | -        |
|                               | AMLR12DEHV9  | -           | positive    | -           | -            | -          | -        | -        |
|                               | AMLR12DEF 5  | positive    | -           | -           | -            | -          | -        | -        |
|                               | AMLR12DES 9  | -           | -           | -           | -            | -          | positive | -        |
|                               | AMLR12DEMS4  | -           | -           | -           | -            | -          | -        | -        |
|                               | AMLR12DEK 2  | -           | -           | -           | -            | -          | -        | -        |
|                               | AML-4 DEBI17 | -           | -           | -           | -            | -          | -        | positive |
|                               | AMLS12DEE 2  | -           | -           | -           | -            | positive   | -        | -        |
|                               | AMLR12DEE 5  | -           | -           | -           | -            | positive   | -        | -        |
|                               | AMLR12DEFB4  | -           | -           | -           | -            | positive   | -        | positive |
|                               | AMLR12DERE2  | -           | -           | -           | -            | positive   | -        | -        |
|                               | AMLS12DET 2  | -           | -           | -           | -            | positive   | -        | -        |
|                               | AMLS12DEHV2  | -           | -           | -           | -            | positive   | -        | -        |
|                               | AMLR17DEGI4  | -           | -           | -           | -            | -          | -        | -        |
|                               | AMLS12DES 1  | -           | -           | -           | -            | positive   | -        | positive |
|                               | AMLR17DEMZ2  | -           | -           | -           | -            | positive   | -        | -        |
|                               | AMLS12DEDR6  | -           | -           | -           | -            | positive   | -        | -        |
|                               | AMLR12DEWB4  | -           | -           | -           | -            | positive   | -        | -        |
| strong<br>CSPG4<br>expression | AMLR12DEBI3  | -           | -           | -           | -            | -          | -        | -        |
|                               | AMLR12DEM 14 | -           | -           | positive    | -            | -          | -        | -        |
|                               | AMLR12DEBI1  | -           | -           | -           | -            | -          | -        | positive |
|                               | AMLR12DEM 24 | -           | -           | -           | positive     | -          | -        | -        |
|                               | AMLR17DES 9  | -           | -           | -           | -            | -          | -        | -        |
|                               | AMLR17DES 6  | -           | -           | -           | -            | -          | -        | -        |
|                               | AMLR17DEHH2  | -           | -           | -           | -            | -          | -        | -        |
|                               | AMLS12DES 3  | -           | -           | -           | -            | -          | -        | -        |
